# Supplementary material
Source: publisher figshare collection journal article supplement (https://frontiersin.figshare.com/ndownloader/files/41649144)
Supplement: Supplementary file [file 41649144]

**Expanding the phenotype of *THRB*: a range of macular dystrophies as the major clinical manifestations in patients with a dominant splicing variant**  
 Fernández-Suárez E et al., Front. Cell Dev. Biol. 2023

**Supplementary Table 2** Different *THRB* *in vivo* and *in vitro* knock-out and knock-down models and its phenotypic effect.

| MODEL ORGANISM                        | REFERENCE NAME METHOD                                                       | <i>THRB</i> EFFECT                                                           | OBSERVED PHENOTYPE                                                                                                   | REFERENCE                     |
|---------------------------------------|-----------------------------------------------------------------------------|------------------------------------------------------------------------------|----------------------------------------------------------------------------------------------------------------------|-------------------------------|
| <i>Rattus norvegicus</i> (Wistar)     | HG rats<br>Chemical antithyroid solution                                    | T3/T4-deficient                                                              | Decreased retinal growth during the perinatal stage.                                                                 | (Sevilla-Romero et al., 2002) |
| <i>Rattus norvegicus</i> (Long-Evans) | Treatment with propylthiouracil                                             | T3/T4-deficient                                                              | Reduced amplitude of green-flicker ERGs: impaired function of M-cone photoreceptors                                  | (Boyes et al., 2018)          |
| <i>Mus musculus</i>                   | Thrb <sup>b2cre/b2cre</sup>                                                 | Deletion of TRβ2                                                             | Poorly distinguished cones that tend to homogeneity and as expected all express <i>Opn1sw</i> but lack <i>Opn1mw</i> | (Aramaki et al., 2022)        |
|                                       | Thrb <sup>tm2Df/tm2Df</sup>                                                 | Deletion of TRβ2                                                             | Significant loss of functional M-cones.                                                                              | (Ng et al., 2001)             |
|                                       | TRβ <sup>WT/Δ337T</sup><br>TRβ <sup>Δ337T/Δ337T</sup><br>+ 0.1% methimazole | TR unable to bind T3                                                         | The 337T mutation increased S-opsin expression                                                                       | (Pessoa et al., 2008)         |
|                                       | TRβ <sup>WT/E457A</sup><br>TRβ <sup>E457A /E457A</sup>                      | Blocking binding of coactivators to the AF2 domain                           | Decrease (30%) M-opsins in both the dorsal and ventral retina                                                        |                               |
|                                       | TRβ <sup>PV/PV</sup>                                                        | T3 cannot bind to TRβ                                                        | All cones expressed S-opsin                                                                                          |                               |
|                                       | Thrb <sup>b1</sup>                                                          | K.O. Thrb <sup>b1</sup> lacZ mice that express galactosidase instead of TRβ1 | Minor changes in opsin photopigment expression and normal photopic ERG responses                                     | (Ng et al., 2023)             |
| <i>Danio rerio</i>                    | 6BP+1 mutant<br>Frameshift mutation in exon 1 of TRβ2 by CRISPR/Cas9        | Deletion of TRβ2                                                             | Anticipated LWS-cone loss                                                                                            | (Deveau et al., 2020)         |
|                                       | 3BP mutant<br>Frame single codon deletion in exon 1 of TRβ2 by CRISPR/Cas9  | Deletes Tyr61, leaves the DNA binding site and ligand binding site intact    | Cone peaks shifted significantly to shorter wavelengths                                                              |                               |
|                                       | Morpholino trβ2 knockdown                                                   | Decrease of trβ2 expression                                                  | Reduced number of L cones and increase in UV cones                                                                   | (Suzuki et al., 2013)         |
|                                       | Morpholino Thrbβ knockout in <i>tbx2b</i> <sup>lor/lor</sup> background     | Deletion of Thrbβ in Tbx2 Hypomorphic allele                                 | Overabundance of rods and a small number of UV cones                                                                 | (DuVal and Allison, 2018)     |

|                                                  |                                                                                  |                                            |                                                                 |                          |
|--------------------------------------------------|----------------------------------------------------------------------------------|--------------------------------------------|-----------------------------------------------------------------|--------------------------|
|                                                  | Morpholino<br>Thrb knockdown in<br><i>tbx2b</i> <sup>fbv/fbv</sup><br>background | Deletion of<br>Thrb in Tbx2<br>Null allele | Have lots of rods and a<br>near-complete absence of<br>UV cones |                          |
| <b><i>Homo sapiens</i></b><br><b>(organoids)</b> | Thrb null mutant<br>Knockout by<br>CRISPR/Cas9                                   | Completely<br>ablate THRB<br>function      | Complete conversion of<br>all cones to the S type               | (Eldred et al.,<br>2018) |

#### Supplementary Table 1 references

- Aramaki, M., Wu, X., Liu, H., Liu, Y., Cho, Y.W., Song, M., et al. (2022). Transcriptional control of cone photoreceptor diversity by a thyroid hormone receptor. *Proc Natl Acad Sci U S A* 119(49), e2209884119. doi: 10.1073/pnas.2209884119.
- Boyes, W.K., Degn, L., George, B.J., and Gilbert, M.E. (2018). Moderate perinatal thyroid hormone insufficiency alters visual system function in adult rats. *Neurotoxicology* 67, 73-83. doi: 10.1016/j.neuro.2018.04.013.
- Deveau, C., Jiao, X., Suzuki, S.C., Krishnakumar, A., Yoshimatsu, T., Hejtmancik, J.F., et al. (2020). Thyroid hormone receptor beta mutations alter photoreceptor development and function in Danio rerio (zebrafish). *PLoS Genet* 16(6), e1008869. doi: 10.1371/journal.pgen.1008869.
- DuVal, M.G., and Allison, W.T. (2018). Photoreceptor Progenitors Depend Upon Coordination of gdf6a, thrbeta, and tbx2b to Generate Precise Populations of Cone Photoreceptor Subtypes. *Invest Ophthalmol Vis Sci* 59(15), 6089-6101. doi: 10.1167/iovs.18-24461.
- Eldred, K.C., Hadyniak, S.E., Hussey, K.A., Brennerman, B., Zhang, P.W., Chamling, X., et al. (2018). Thyroid hormone signaling specifies cone subtypes in human retinal organoids. *Science* 362(6411). doi: 10.1126/science.aau6348.
- Ng, L., Hurley, J.B., Dierks, B., Srinivas, M., Salto, C., Vennstrom, B., et al. (2001). A thyroid hormone receptor that is required for the development of green cone photoreceptors. *Nat Genet* 27(1), 94-98. doi: 10.1038/83829.
- Ng, L., Liu, H., Liu, Y., and Forrest, D. (2023). Biphasic expression of thyroid hormone receptor TRbeta1 in mammalian retina and anterior ocular tissues. *Front Endocrinol (Lausanne)* 14, 1174600. doi: 10.3389/fendo.2023.1174600.
- Pessoa, C.N., Santiago, L.A., Santiago, D.A., Machado, D.S., Rocha, F.A., Ventura, D.F., et al. (2008). Thyroid hormone action is required for normal cone opsin expression during mouse retinal development. *Invest Ophthalmol Vis Sci* 49(5), 2039-2045. doi: 10.1167/iovs.07-0908.
- Roberts, M.R., Srinivas, M., Forrest, D., Morreale de Escobar, G., and Reh, T.A. (2006). Making the gradient: thyroid hormone regulates cone opsin expression in the developing mouse retina. *Proc Natl Acad Sci U S A* 103(16), 6218-6223. doi: 10.1073/pnas.0509981103.
- Sevilla-Romero, E., Munoz, A., and Pinazo-Duran, M.D. (2002). Low thyroid hormone levels impair the perinatal development of the rat retina. *Ophthalmic Res* 34(4), 181-191. doi: 10.1159/000063885.

**Expanding the phenotype of *THRB*: a range of macular dystrophies as the major clinical manifestations in patients with a dominant splicing variant**

Fernández-Suárez E et al., Front. Cell Dev. Biol. 2023

Suzuki, S.C., Bleckert, A., Williams, P.R., Takechi, M., Kawamura, S., and Wong, R.O. (2013). Cone photoreceptor types in zebrafish are generated by symmetric terminal divisions of dedicated precursors. *Proc Natl Acad Sci U S A* 110(37), 15109-15114. doi: 10.1073/pnas.1303551110.
